# Supplementary material for: A Multimodal Rolling-Window Framework for ICU Transfer Prediction in Hospitalized Patients with Comorbid Hypertension
Source: Research Square preprint supplement (doi:10.21203/rs.3.rs-8548831/v1), 2026-01-20
Supplement: Supplementary file 1 [file ab5ae4d5e4196d9c30ae74e0.docx]

## **Supplementary Information**

### **Supplementary Section 1. ICD codes for inclusion and exclusion criteria**

This section provides the complete list of diagnosis codes used in this study to identify systemic hypertension and related subtypes for inclusion, as well as codes for excluded hypertension types. These codes were applied to the admission diagnosis records in the MIMIC‑IV v3.1 database to define the study cohort.

**Table S1. ICD‑9 and ICD‑10 codes for inclusion and exclusion criteria.**

| **Criteria** | **Hypertension Type** | **ICD‑9 Codes** | **ICD‑10 Codes** |
| --- | --- | --- | --- |
| **Inclusion** | Systemic Hypertension | 4019, 401, 4010, 4011, 40200, 40201, 40210, 40211, 40290, 40291 | I10, I11, I12, I13, I110, I119, I120, I129, I130, I131, I132, I139 |
| Secondary Hypertension | 4050, 4051, 4052, 4053, 4054, 4055, 4056, 4057, 4058, 4059 | I15, I150, I151, I152, I158, I159 |
| Hypertensive Complications | 40390, 40391, 40400, 40401, 40402, 40403, 40410, 40411, 40412, 40413 | I11, I12, I13 |
| **Exclusion** | Non-systemic Hypertension (pulmonary, portal, intracranial, ocular) | 4160, 41611, 41619, 4168, 4169, 5723, 3482, 36504 | I27, I270, I271, I272, I278, I279, K766, G930, G932, H4000, H4001, H4002, H4003 |

**Note:**

1. Inclusion codes define systemic hypertension and related conditions retained for the study cohort.
2. Exclusion codes refer to non‑systemic hypertension conditions. **A hospitalization was excluded only if it contained exclusively exclusion codes without any inclusion code.** If both inclusion and exclusion codes were present, **the hospitalization was retained**.
3. This approach ensures that **systemic hypertension is the defining condition** of the final cohort.

### **Supplementary Section 2. Enhanced Semantic Analysis Approach for Postoperative ICU Transfer Identification**

**Figure S1. Two-Stage Workflow for Surgical and Postoperative ICU Identification.**

**
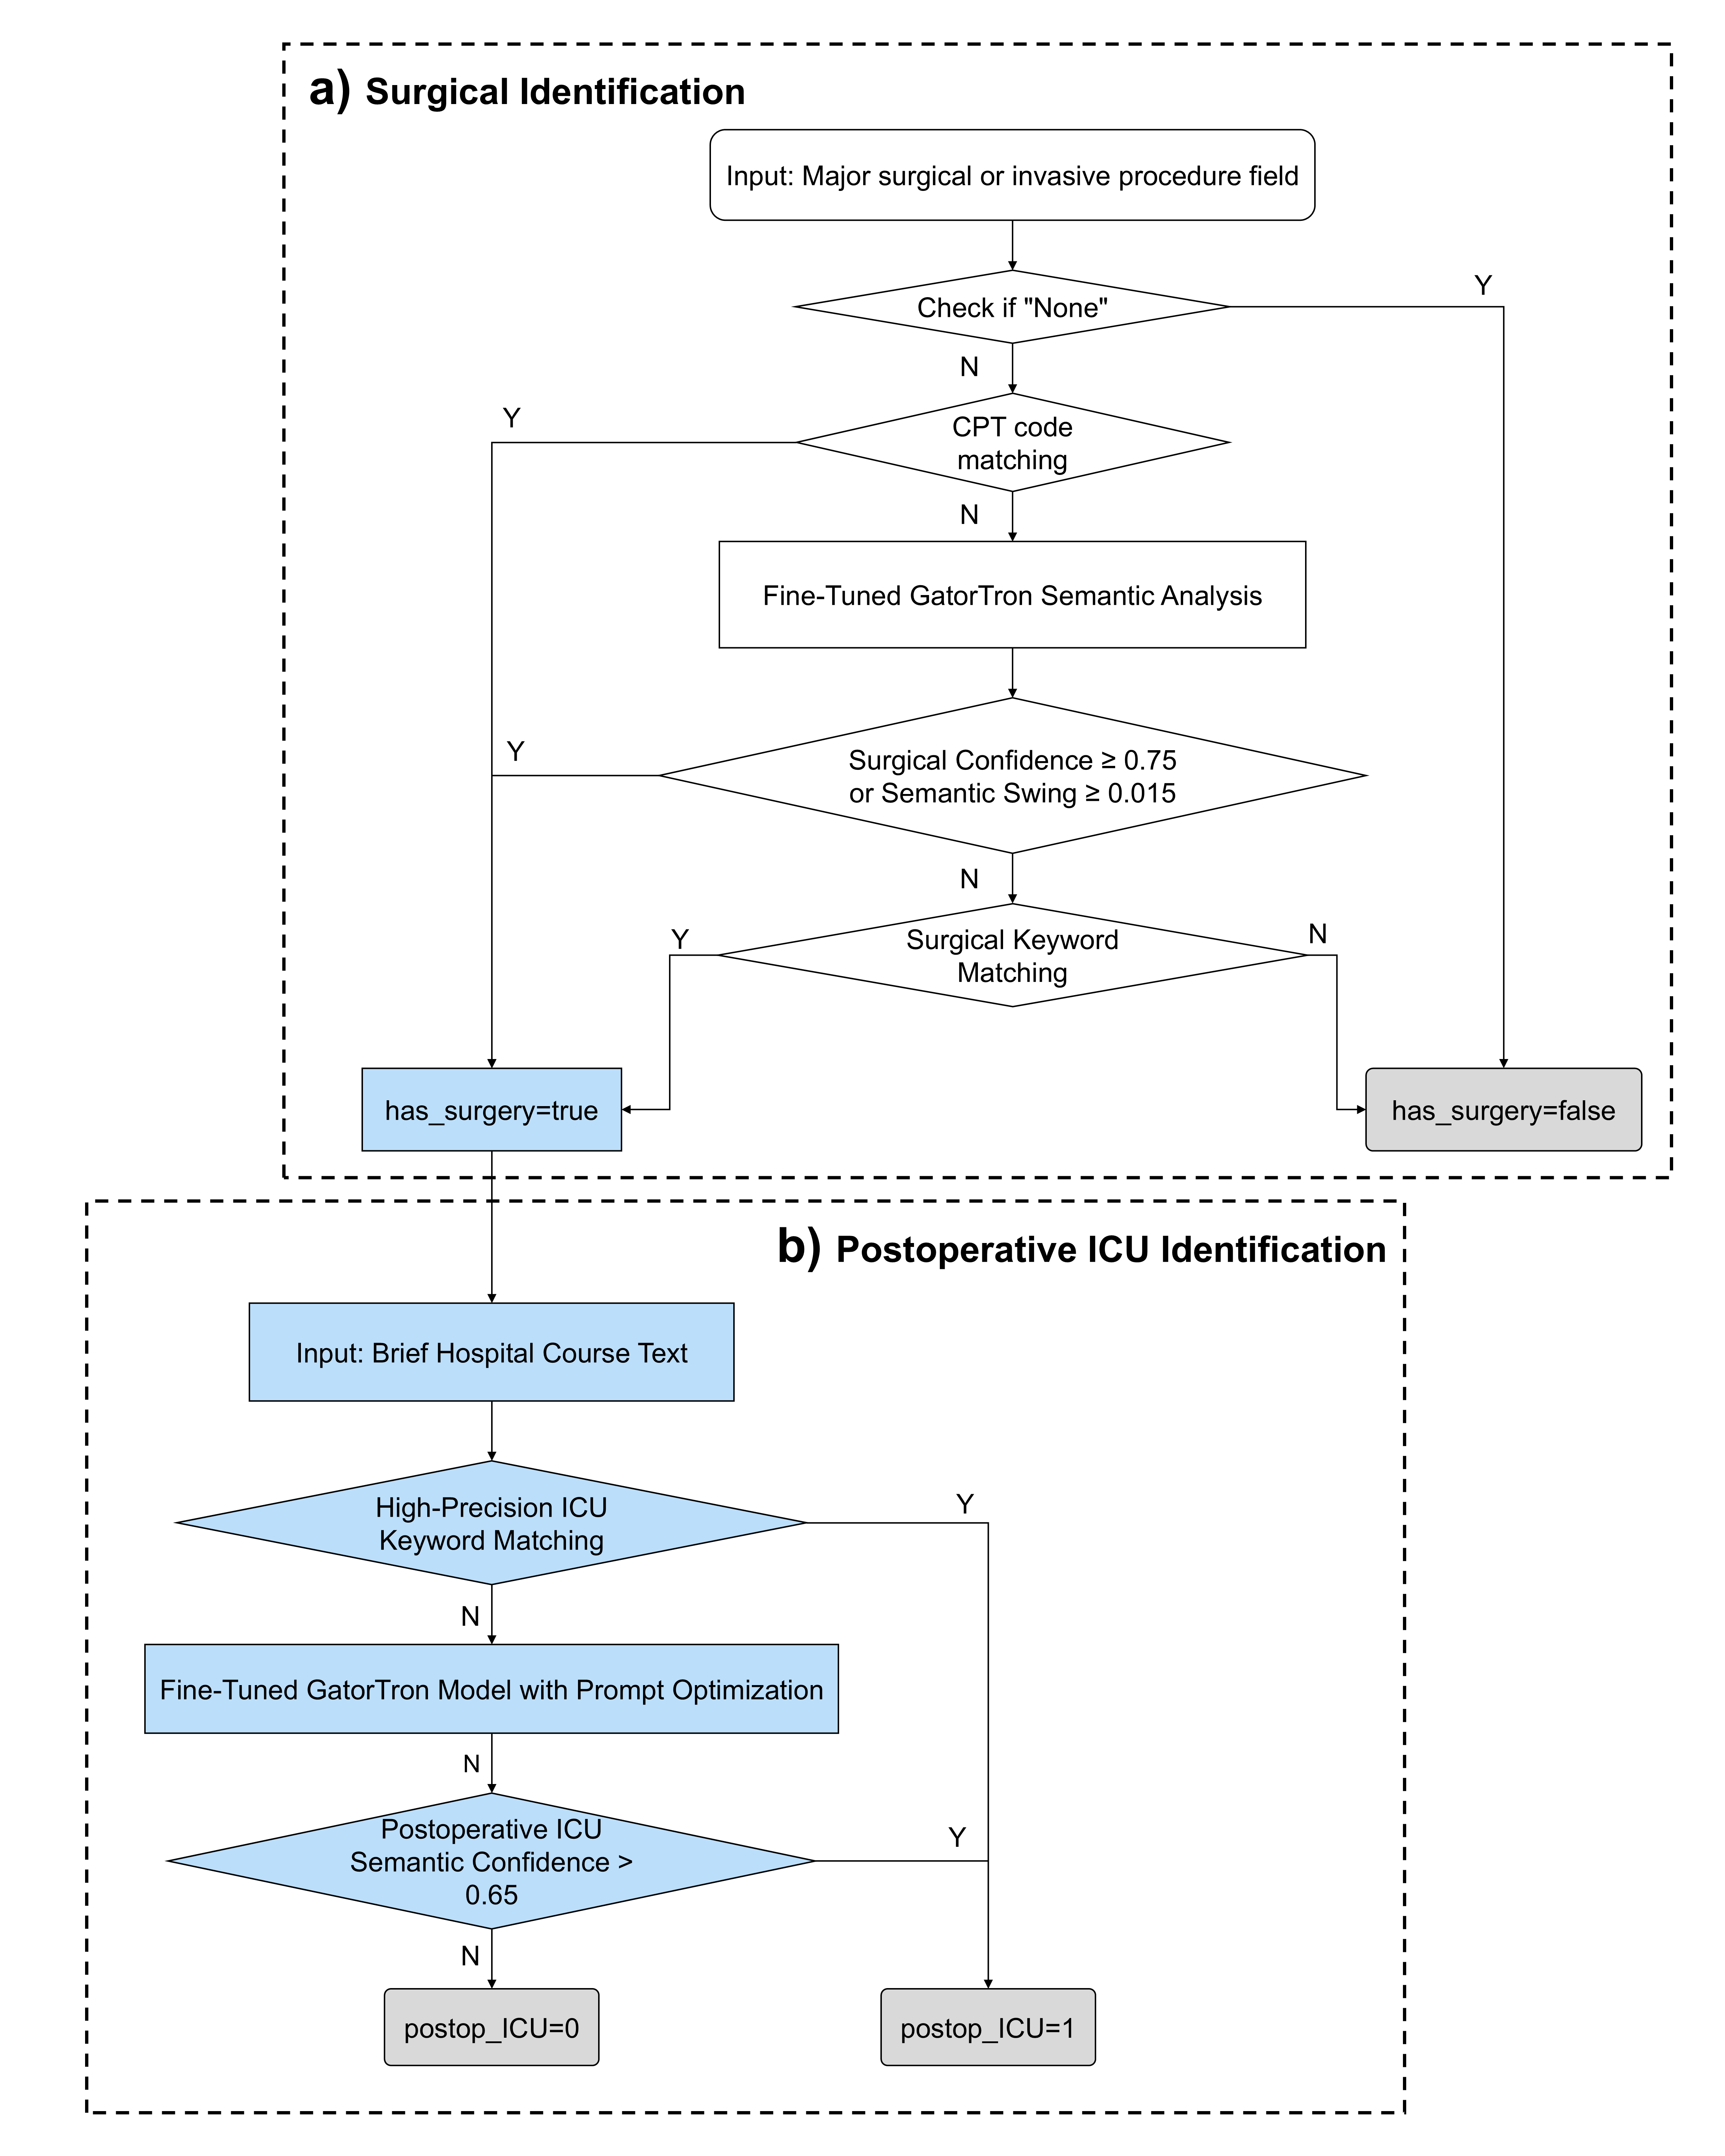
**

**Note:** This workflow illustrates the two-stage data-cleaning process for identifying and excluding postoperative ICU transfers, integrating structured procedure fields, CPT code matching, and fine-tuned semantic analysis of unstructured hospital course text.

To ensure that our cohort for ICU risk modeling reflects patients experiencing gradual clinical deterioration rather than surgery-driven events, we implemented a data-cleaning pipeline to identify and exclude postoperative ICU transfers. This approach integrates structured procedure codes from the “Major surgical or invasive procedure” field with clinical text from the “Brief Hospital Course”. Both surgical status and postoperative ICU events are determined through a combination of rule-based matching and semantic analysis using a GatorTron model pretrained on large-scale clinical corpora (including MIMIC-III) and fine-tuned with expert-labeled samples, with prompt optimization applied to enhance ICU identification accuracy. This integrated pipeline (see Figure S1) provides a reproducible, interpretable, and clinically grounded framework for refining the study cohort.

### **Supplementary Section 3. Laboratory Items Used for Feature Extraction**

Laboratory data were extracted for 40 commonly measured items spanning chemistry, hematology, blood gas, and urinalysis panels. These items include routinely collected biomarkers such as white blood cell count, hemoglobin, creatinine, blood urea nitrogen, sodium, potassium, alanine aminotransferase, and international normalized ratio, among others. The complete list of laboratory items used in this study is provided in Supplementary Table S2.

**Table S2. Laboratory Items for Feature Extraction.**

| **Itemid** | **Label** | **Fluid** | **Category** |
| --- | --- | --- | --- |
| 50802 | Base Excess | Blood | Blood Gas |
| 50804 | Calculated Total CO2 | Blood | Blood Gas |
| 50813 | Lactate | Blood | Blood Gas |
| 50817 | Oxygen Saturation | Blood | Blood Gas |
| 50818 | pCO2 | Blood | Blood Gas |
| 50820 | pH | Blood | Blood Gas |
| 50821 | pO2 | Blood | Blood Gas |
| 50861 | Alanine Aminotransferase (ALT) | Blood | Chemistry |
| 50862 | Albumin | Blood | Chemistry |
| 50863 | Alkaline Phosphatase | Blood | Chemistry |
| 50878 | Asparate Aminotransferase (AST) | Blood | Chemistry |
| 50882 | Bicarbonate | Blood | Chemistry |
| 50885 | Bilirubin, Total | Blood | Chemistry |
| 50889 | C-Reactive Protein | Blood | Chemistry |
| 50893 | Calcium, Total | Blood | Chemistry |
| 50902 | Chloride | Blood | Chemistry |
| 50912 | Creatinine | Blood | Chemistry |
| 50915 | D-Dimer | Blood | Chemistry |
| 50931 | Glucose | Blood | Chemistry |
| 50960 | Magnesium | Blood | Chemistry |
| 50971 | Potassium | Blood | Chemistry |
| 50983 | Sodium | Blood | Chemistry |
| 51006 | Urea Nitrogen | Blood | Chemistry |
| 51094 | pH | Urine | Chemistry |
| 51221 | Hematocrit | Blood | Hematology |
| 51222 | Hemoglobin | Blood | Hematology |
| 51237 | INR(PT) | Blood | Hematology |
| 51265 | Platelet Count | Blood | Hematology |
| 51274 | PT | Blood | Hematology |
| 51275 | PTT | Blood | Hematology |
| 51279 | Red Blood Cells | Blood | Hematology |
| 51301 | White Blood Cells | Blood | Hematology |
| 51463 | Bacteria | Urine | Hematology |
| 51466 | Blood | Urine | Hematology |
| 51493 | RBC | Urine | Hematology |
| 51516 | WBC | Urine | Hematology |
| 51623 | Fibrinogen | Blood | Chemistry |
| 51981 | Glucose | Urine | Chemistry |
| 51984 | Ketone | Urine | Chemistry |
| 51987 | Nitrite | Urine | Chemistry |
| 51992 | Protein | Urine | Chemistry |
| 51994 | Specific Gravity | Urine | Chemistry |

### **Supplementary Section 4. Comprehensive Temporal Performance Data**

This section provides the complete set of performance metrics for the baseline (structured data only) and multimodal (structured data + Qwen embeddings) models across all eleven 24-hour prediction windows. The detailed data supporting the primary temporal analysis of AUPRC and PPV presented in the main text are available in Supplementary Table S3, with Sensitivity (~0.8–0.9) and Negative Predictive Value (NPV; >0.98) remaining largely stable across windows, and Accuracy showing a progressive increase over time as later windows contain more strongly separable physiological patterns.

To further elucidate the temporal dynamics of other key metrics, supplementary figures are included below. Supplementary Figure S2(A–C) depicts the temporal trends for AUROC, Specificity, and Accuracy, respectively, offering additional insight into the models’ performance regarding false-alarm reduction and overall prediction reliability across the longitudinal course.

**Table S3. Detailed Temporal Performance Metrics for Baseline and Multimodal Models.**

| **Time Window (hours)** | **Model** | **AUPRC** | **AUROC** | **sensitivity** | **specificity** | **PPV** | **NPV** | **accuracy** | **Total Samples** | **Positive Samples** | **Training Total** | **Training Positive** | **Training Negative** |
| --- | --- | --- | --- | --- | --- | --- | --- | --- | --- | --- | --- | --- | --- |
| 24 | baseline | 0.2823 ± 0.0370 | 0.7752 ± 0.0160 | 0.8294 ± 0.0200 | 0.5626 ± 0.0058 | 0.1123 ± 0.0037 | 0.9802 ± 0.0025 | 0.5793 ± 0.0067 | 166,112 | 534 | 7,713 | 2,373 | 5,340 |
| 48 | baseline | 0.2918 ± 0.0220 | 0.8252 ± 0.0119 | 0.8578 ± 0.0128 | 0.6543 ± 0.0320 | 0.1427 ± 0.0096 | 0.9857 ± 0.0008 | 0.6670 ± 0.0293 | 165,578 | 409 | 5,907 | 1,817 | 4,090 |
| 72 | baseline | 0.3390 ± 0.0244 | 0.8542 ± 0.0162 | 0.8454 ± 0.0160 | 0.7237 ± 0.0319 | 0.1710 ± 0.0166 | 0.9859 ± 0.0015 | 0.7313 ± 0.0298 | 165,169 | 323 | 4,665 | 1,435 | 3,230 |
| 96 | baseline | 0.3460 ± 0.0651 | 0.8783 ± 0.0051 | 0.8182 ± 0.0107 | 0.7850 ± 0.0007 | 0.2024 ± 0.0018 | 0.9848 ± 0.0009 | 0.7871 ± 0.0005 | 164,846 | 241 | 3,481 | 1,071 | 2,410 |
| 120 | baseline | 0.3584 ± 0.0607 | 0.8810 ± 0.0224 | 0.8789 ± 0.0086 | 0.7531 ± 0.0608 | 0.1998 ± 0.0409 | 0.9894 ± 0.0008 | 0.7609 ± 0.0568 | 164,605 | 157 | 2,267 | 697 | 1,570 |
| 144 | baseline | 0.4352 ± 0.0792 | 0.9073 ± 0.0177 | 0.8352 ± 0.0296 | 0.8425 ± 0.0439 | 0.2706 ± 0.0438 | 0.9872 ± 0.0017 | 0.8420 ± 0.0393 | 164,448 | 128 | 1,849 | 569 | 1,280 |
| 168 | baseline | 0.4151 ± 0.0409 | 0.9233 ± 0.0039 | 0.8336 ± 0.0161 | 0.8609 ± 0.0179 | 0.2877 ± 0.0230 | 0.9873 ± 0.0010 | 0.8592 ± 0.0161 | 164,320 | 95 | 1,372 | 422 | 950 |
| 192 | baseline | 0.4138 ± 0.0401 | 0.9132 ± 0.0225 | 0.8672 ± 0.0109 | 0.8624 ± 0.0424 | 0.3130 ± 0.0787 | 0.9898 ± 0.0009 | 0.8627 ± 0.0396 | 164,225 | 74 | 1,161 | 343 | 818 |
| 216 | baseline | 0.4876 ± 0.0491 | 0.9291 ± 0.0173 | 0.8865 ± 0.0256 | 0.9108 ± 0.0115 | 0.4010 ± 0.0361 | 0.9918 ± 0.0019 | 0.9093 ± 0.0117 | 164,151 | 69 | 1,126 | 326 | 800 |
| 240 | baseline | 0.5567 ± 0.0679 | 0.9431 ± 0.0283 | 0.8528 ± 0.0313 | 0.9235 ± 0.0257 | 0.4414 ± 0.0832 | 0.9894 ± 0.0025 | 0.9191 ± 0.0258 | 164,082 | 55 | 1,083 | 283 | 800 |
| 264 | baseline | 0.6522 ± 0.0731 | 0.9596 ± 0.0125 | 0.8519 ± 0.0262 | 0.9456 ± 0.0189 | 0.5082 ± 0.0886 | 0.9904 ± 0.0013 | 0.9402 ± 0.0182 | 164,027 | 42 | 1,036 | 236 | 800 |
| 24 | Qwen | 0.3975 ± 0.0194 | 0.8448 ± 0.0085 | 0.8218 ± 0.0096 | 0.7069 ± 0.0459 | 0.1603 ± 0.0211 | 0.9835 ± 0.0002 | 0.7141 ± 0.0425 | 166,112 | 534 | 7,713 | 2,373 | 5,340 |
| 48 | Qwen | 0.3260 ± 0.0298 | 0.8520 ± 0.0134 | 0.8511 ± 0.0086 | 0.6863 ± 0.0218 | 0.1538 ± 0.0101 | 0.9857 ± 0.0012 | 0.6966 ± 0.0209 | 165,578 | 409 | 5,907 | 1,817 | 4,090 |
| 72 | Qwen | 0.3985 ± 0.0406 | 0.8779 ± 0.0135 | 0.8578 ± 0.0334 | 0.7395 ± 0.0225 | 0.1808 ± 0.0124 | 0.9874 ± 0.0028 | 0.7469 ± 0.0204 | 165,169 | 323 | 4,665 | 1,435 | 3,230 |
| 96 | Qwen | 0.4148 ± 0.0553 | 0.8974 ± 0.0107 | 0.8425 ± 0.0156 | 0.8055 ± 0.0118 | 0.2246 ± 0.0132 | 0.9871 ± 0.0014 | 0.8078 ± 0.0120 | 164,846 | 241 | 3,481 | 1,071 | 2,410 |
| 120 | Qwen | 0.4086 ± 0.0568 | 0.8974 ± 0.0182 | 0.8539 ± 0.0304 | 0.8158 ± 0.0316 | 0.2395 ± 0.0258 | 0.9882 ± 0.0021 | 0.8182 ± 0.0284 | 164,605 | 157 | 2,267 | 697 | 1,570 |
| 144 | Qwen | 0.4834 ± 0.0680 | 0.9267 ± 0.0136 | 0.8118 ± 0.0129 | 0.8879 ± 0.0140 | 0.3276 ± 0.0228 | 0.9861 ± 0.0007 | 0.8831 ± 0.0124 | 164,448 | 128 | 1,849 | 569 | 1,280 |
| 168 | Qwen | 0.4553 ± 0.0167 | 0.9255 ± 0.0103 | 0.8568 ± 0.0328 | 0.8474 ± 0.0378 | 0.2820 ± 0.0502 | 0.9890 ± 0.0020 | 0.8480 ± 0.0334 | 164,320 | 95 | 1,372 | 422 | 950 |
| 192 | Qwen | 0.4518 ± 0.0215 | 0.9172 ± 0.0219 | 0.8557 ± 0.0224 | 0.8519 ± 0.0432 | 0.2908 ± 0.0589 | 0.9889 ± 0.0012 | 0.8522 ± 0.0391 | 164,225 | 74 | 1,161 | 343 | 818 |
| 216 | Qwen | 0.5432 ± 0.0170 | 0.9370 ± 0.0170 | 0.8721 ± 0.0176 | 0.9109 ± 0.0094 | 0.3966 ± 0.0276 | 0.9907 ± 0.0013 | 0.9085 ± 0.0094 | 164,151 | 69 | 1,126 | 326 | 800 |
| 240 | Qwen | 0.6056 ± 0.1348 | 0.9486 ± 0.0304 | 0.8343 ± 0.0182 | 0.9167 ± 0.0349 | 0.4265 ± 0.1062 | 0.9881 ± 0.0016 | 0.9116 ± 0.0334 | 164,082 | 55 | 1,083 | 283 | 800 |
| 264 | Qwen | 0.6334 ± 0.0352 | 0.9616 ± 0.0060 | 0.8519 ± 0.0262 | 0.9373 ± 0.0111 | 0.4622 ± 0.0649 | 0.9903 ± 0.0014 | 0.9323 ± 0.0117 | 164,027 | 42 | 1,036 | 236 | 800 |

**Figure S2. Temporal trends of auxiliary performance metrics.**


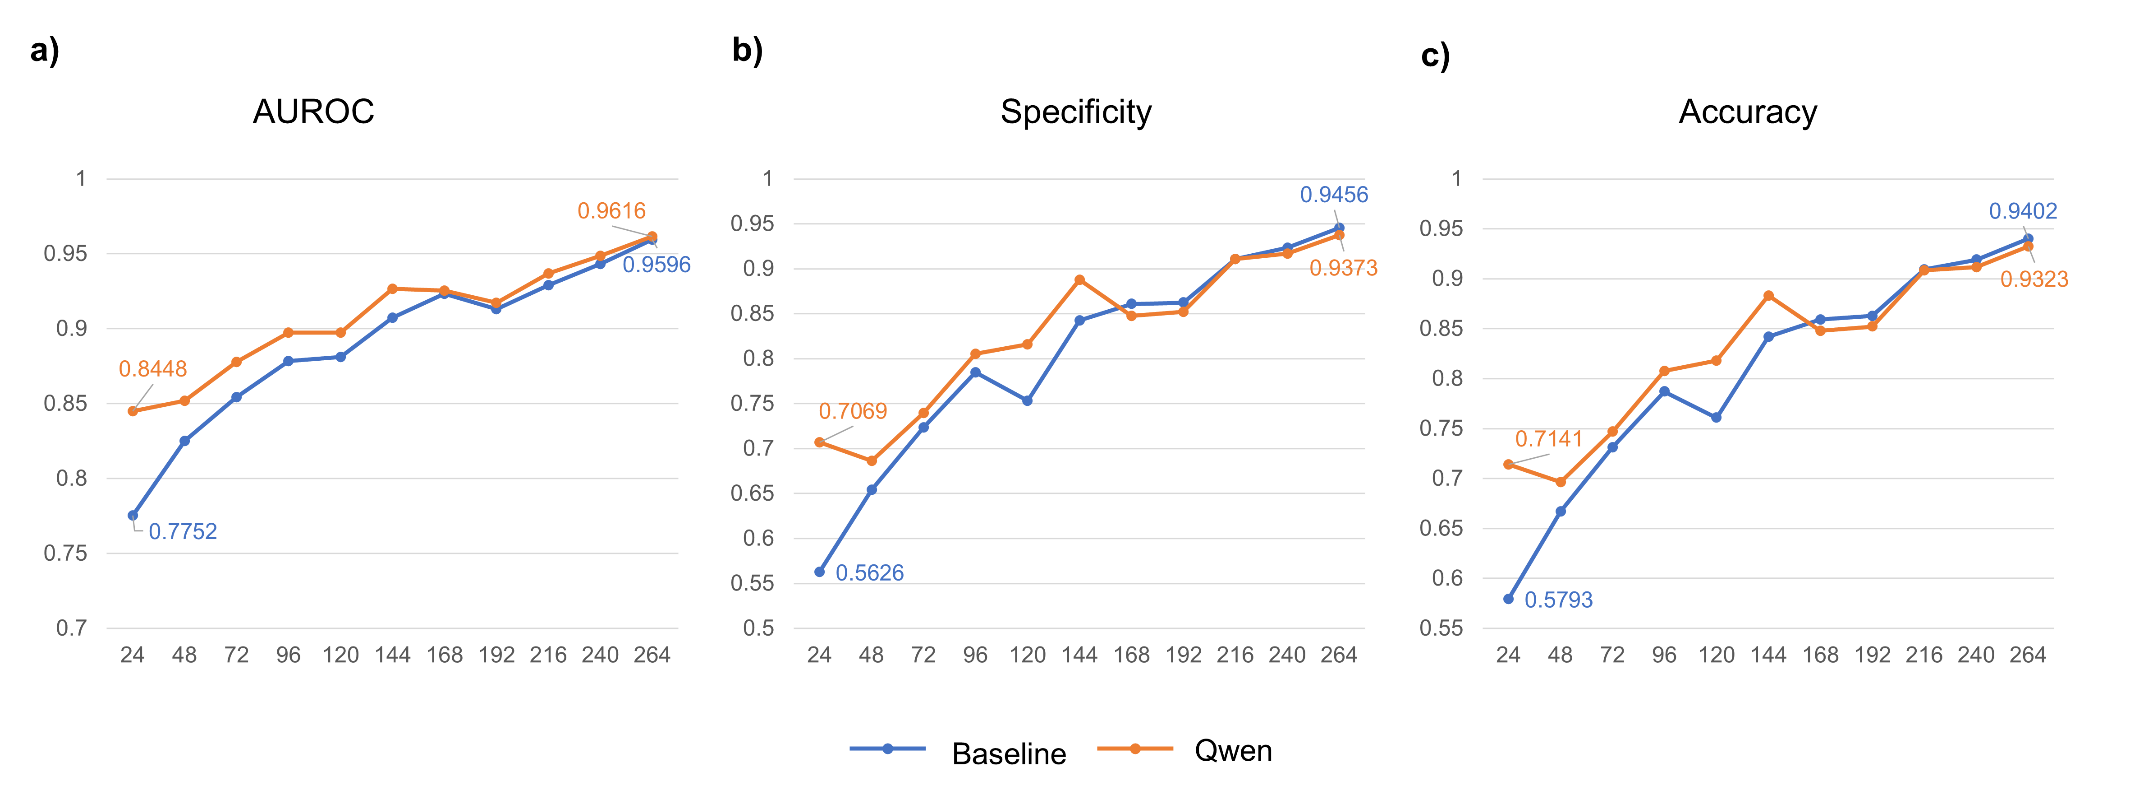


**Note:** (A) Area Under the Receiver Operating Characteristic Curve (AUROC). (B) Specificity. (C) Accuracy. Line plots compare the baseline and multimodal models across sequential 24-hour prediction windows.
